# **Membrane cliffs are giant, recursive platforms that drive calcium and protein kinase signaling for cell growth**

Marco Trerotola <sup>1,2</sup>, Valeria Relli <sup>1</sup>, Romina Tripaldi <sup>1</sup>, Pasquale Simeone <sup>1</sup>, Emanuela Guerra <sup>1,2</sup>, Andrea Sacchetti <sup>3</sup>, Martina Ceci <sup>1,2</sup>, Ludovica Pantalone <sup>1</sup>, Paolo Ciufici <sup>1</sup>, Antonino Moschella <sup>4</sup>, Valeria R. Caiolfa <sup>5,6</sup>, Moreno Zamai <sup>5,6</sup>, and Saverio Alberti <sup>1,4,\*</sup>

<sup>1</sup> Laboratory of Cancer Pathology, Centre for Advanced Studies and Technology (CAST), University “G. D’Annunzio”, Chieti, Italy

<sup>2</sup> Department of Medical, Oral and Biotechnological Sciences, University “G. d’Annunzio”, Chieti, Italy

<sup>3</sup> Department of Pathology, Erasmus University Medical Center, Rotterdam, The Netherlands

<sup>4</sup> Unit of Medical Genetics, Department of Biomedical Sciences (BIOMORF), University of Messina, Messina, Italy

<sup>5</sup> Microscopy and Dynamic Imaging Unit, Centro Nacional de Investigaciones Cardiovasculares (CNIC), Madrid, Spain

<sup>6</sup> Experimental Imaging Centre, IRCCS Ospedale San Raffaele, Milan, Italy

**\* Corresponding author:**

**Saverio Alberti**

Email: [alberti.saverio@gmail.com](mailto:alberti.saverio@gmail.com)

**Running title:**

Membrane macroplatforms drive signaling for cell growth

**Word count:** 3570

**Keywords:**

Signal transduction platforms, cell growth, cell membrane, protein kinases, signal activation.

### **Author contributions**

M.T., V.R., R.T., P.S., A.S., E.G., P.C. performed the cell biology/fluorescence microscopy, biochemical and functional assays; M.Z., V.R.C. performed the super-resolution microscopy assays and the FRET-FLIM studies; P.S. performed quantitative image analysis and statistical tests; A.M., V.G., S.A. performed the data meta-analyses; M.T., S.A. wrote the manuscript; M.Z., V.R.C. revised the manuscript; S.A. directed the research activities.

### **Acknowledgments**

We thank I. Upmann and M. Garcia-Parajo for support with NSOM microscopy. We thank J. Schlessinger, K. Simons, H. Morrison, R. Plebani, L. Antolini, K. Havas, D. Parazzoli, A. Oldani, A. D'Angelo and G. V. Beznoussenko for help and discussion during this work. We gratefully acknowledge the support of Fondazione Cassa di Risparmio della Provincia di Chieti, Fondazione Compagnia di San Paolo (Grant 2489IT), the Ministry of the University and Research (MIUR, Italy) (SCN\_00558), the Ministry of Development (MISE, Italy) (MI01\_00424), Region Abruzzo (POR FESR 2007-2013: Activity 1.1.1 line B), the Italian Association for Cancer Research (AIRC, Italy), the Programma Per Giovani Ricercatori "Rita Levi Montalcini" (MIUR, Italy – Grant PGR12I7N1Z for support to M.T, the European Regional Development Fund (FEDER) "Una manera de hacer Europa" for support to V.R.C. and M.Z.. FLIM and STED were performed at the Centro National de Investigaciones Cardiovasculares, CNIC (Madrid, Spain), which is supported by the Instituto de Salud Carlos III (ISCIII), the Ministerio de Ciencia e Innovación (MCIN) and the Pro CNIC Foundation.

The sponsors had no role in the design and conduct of this study, nor in the collection, analysis, and interpretation of the data, nor in the preparation, review, or approval of the manuscript.

### **Competing financial interests**

The authors declare no competing financial interests.

## **Abstract**

The transmembrane glycoproteins Trop-1/EpCAM and Trop-2 independently trigger  $\text{Ca}^{2+}$  and kinase signals for cell growth and tumor progression. We discovered that Trop-1 and Trop-2 are recruited at overlapping sites at free cell edges. Z-stack analysis and three-dimensional reconstruction of these sites revealed previously unrecognized, protruding membrane regions  $\geq 20$   $\mu\text{m}$ -long, up to 1.5  $\mu\text{m}$  high, then named 'cliffs'. Cliffs appeared confined to essentially immobile sites of the cell membrane, where they recursively assembled over hundreds of seconds. Cliffs were shown to recruit growth-driving kinases and downstream cytoplasmic effectors. Trop-2 stimulates cell growth through a membrane super-complex that comprises CD9 and PKC $\alpha$ . Our findings indicated that the growth-driving Trop-2 super-complex assembles at cliffs. Cliffs acted as sites of phosphorylation/activation of growth-driving kinases and as origins of  $\text{Ca}^{2+}$  signaling waves, indicating cliffs as novel signaling platforms for drivers of cell growth. Cliffs were induced by growth factors and disappeared upon growth factor deprivation, suggesting cliffs as pivotal platforms for signaling for cell growth.

## 1 **Introduction**

2 The transmembrane glycoproteins Trop-1/EpCAM and Trop-2 have been shown to drive tumor  
3 growth<sup>1-3</sup> and metastatic diffusion<sup>4,5</sup>. Trops drive tumor progression upon overexpression as wild-  
4 type molecules<sup>1,2,6,7</sup>, which are activated by ADAM10 cleavage at a conserved position in the  
5 thyroglobulin domain<sup>4,8-11</sup>. Trop proteolytic cleavage triggers a downstream proteolytic cascade,  
6 carried out by the TNF- $\alpha$ -converting enzyme (TACE) followed by  $\gamma$ -secretase cleavage within the  
7 transmembrane domain, which leads to nuclear signaling and transcription factor activation<sup>4,10,12,13</sup>.

8 Trop-2 was shown to activate a ubiquitous set of signaling molecules, that subsequently  
9 modulate the basal growth programs of cancer cells. This protein super-complex is assembled around  
10 CD9, Trop-2<sup>14</sup> and the Na<sup>+</sup>/K<sup>+</sup>-ATPase ion pump. Activation of the Trop-2 supercomplex leads to  
11 the release of intracellular Ca<sup>2+</sup><sup>14,15</sup> and to the recruitment of PKC $\alpha$  to the cell membrane, for  
12 phosphorylation of the Trop-2 cytoplasmic tail. This establishes a feed-forward activation loop with  
13 remodeling of the  $\beta$ -actin/ $\alpha$ -actinin/myosin II cytoskeleton, through cofilin-1, annexins A1/A6/A11  
14 and gelsolin. This drives malignant progression through the cleavage of the  $\beta$ -actin-binding site of  
15 E-cadherin<sup>14</sup>, and downstream activation of Akt<sup>16</sup>, ERK, NF $\kappa$ B, and cyclin D1<sup>17</sup>.

16 We discovered that the Trop super-complex is assembled at newly identified, protruding  
17 membrane regions,  $\geq 20$   $\mu$ m long and up to 1.5  $\mu$ m high, which were named cliffs. Cliffs recursively  
18 assembled at conserved, essentially immobile sites of the cell border and recruited growth-driving  
19 kinases and downstream cytoplasmic effectors. Cliffs were shown to operate as signaling platforms  
20 for drivers of cell growth, through kinase phosphorylation/activation and as trigger sites for waves of  
21 Ca<sup>2+</sup> signals. Cliffs were shown to be induced by growth factors and to wane upon growth factor  
22 deprivation, suggesting cliffs to play a pivotal role in signaling for cell growth.

23

## 24 **Results and discussion**

### 25 **Cell growth drivers localize at overlapping sites of the cell membrane**

26 Trop-1/EpCAM and Trop-2 were previously shown to trigger Ca<sup>2+</sup> signals and to drive cancer cell  
27 growth<sup>1,2,5,6,8,14,15</sup>. We noticed that Trop-1 and Trop-2, despite distinct intra-cellular distribution  
28 patterns (**Figure S1**), were recruited at overlapping sites at the cell membrane (**Figure 1**). This finding  
29 was far from trivial, as Trop-1 is not required for Trop-2 signaling<sup>5,7,14</sup>, first suggesting a broader  
30 functional relevance of these co-recruitment sites.

31 Recruitment of Trop-1 and Trop-2 at the cell membrane is essential for functional activation  
32<sup>4,5,10,11,13,18</sup>, through the assembly of a signaling super-complex<sup>14</sup>. Signaling platforms function as  
33 membrane sites that colocalize molecular signals, thus facilitating their interaction<sup>19,20</sup>. We thus  
34 explored whether Trop recruitment sites of the cell membrane operated as signaling platforms for the



35 Trop super-complex. Using FP chimeras for parallel imaging and functional analysis, we showed that  
36 Trop-1-FP and Trop-2-FP were efficiently transported to the cell membrane, at sharply confined sites  
37 (Figure 2A-C). Care was taken not to overexpress FP-chimera, but to confine expression to average  
38 expression levels in tumor cells <sup>14</sup>. Trop-1-FP and Trop-2-FP were shown to stimulate cell growth  
39 as efficiently as comparable levels of the wild-type molecules (Figure 2A), indicating functional  
40 competence for cell signaling. We went on to assess whether other key components of the Trop  
41 signaling super-complex were co-recruited at the same membrane sites. Non-parametric Spearman  
42 correlation analysis of fractional perimeter segments occupied by any one molecule at any specific  
43 time was performed (Table S1). Trop-1-FP, Trop-2-FP, CD9-FP and ERK-FP were found to tightly  
44 colocalize at the cell membrane (Movies S1, S2), with extremely high correlation coefficients (0.986-  
45 0.993;  $P < 0.0001$ ) (Table S1), supporting the notion that these co-recruitment sites may operate as  
46 functional platforms for signaling. Additional classes of signaling protein-FP chimeras appeared  
47 recruited at these same membrane regions. Recruited molecules included actin-bundling  
48 determinants (fascin-GFP), cytoplasmic kinases (PKC $\alpha$ -GFP) and tetraspanins (CD316-mCherry)  
49 (Figure 2). On the other hand, PKC $\delta$ -GFP (Figure 2C) and PKC $\epsilon$ -GFP were not transported to PKC $\alpha$ -  
50 GFP membrane recruitment sites, suggesting co-recruitment specificity.

51 Analysis of endogenous molecules provided corresponding findings to those obtained with  
52 FP chimeras. Utilizing Trop-2 and CD9 as membrane-recruitment-site tracers, lack of co-recruitment  
53 was shown for EphB2 (Figure 2D), CD34, E-cadherin among transmembrane molecules, caveolin-1,  
54  $\beta$ -catenin among cytoplasmic molecules, thus supporting a model of selective co-recruitment of  
55 specific signal transducers at these sites. Among tetraspanins, we observed tight colocalization and  
56 co-capping of Trop-2 with CD9, CO-029, CD81 and CD98. On the other hand, limited colocalization  
57 was detected with CD316 and essentially none was found with CD151 (Figure 2B), suggesting a fine  
58 regulation of the recruitment of different classes of tetraspanins at these membrane sites <sup>14</sup>.

59

## 60 **The cliff membrane regions**

61 Z-stack analysis and three-dimensional (3D) reconstruction of the membrane Trop-1, Trop-2, CD9  
62 recruitment sites were used to explore the structure of the corresponding membrane regions (Movie  
63 S3). This also allowed us to prevent artifacts due to trivial shifts of motile membranes across  
64 neighbouring confocal sections. The 3D analyses revealed previously unrecognized, protruding  
65 membrane regions (up to 1.5  $\mu\text{m}$  high) (Figure 3A) at conserved sites of the cell border. These  
66 membrane regions were thus named ‘cliffs’ (Box 1).

67 Extensive 3D reconstructions showed that cliff occurrence and localization correlated with  
68 neither the extent of cell motility nor the direction of cell movement (Movies S4). These parameters,

69 i.e. localization at protruding regions of the cell perimeter and occurrence at essentially immobile  
70 membrane sites (Movies S1, S2) set cliffs aside from previously recognized mobile regions of the  
71 cells membrane, such as ruffles, lamellipodia, dorsal ridges<sup>21</sup>. These same structural features were  
72 utilized to systematically identify cliff regions in all subsequent investigations.

73 Cliff membranes were visualized using the signaling super-complex components CD9 and  
74 Trop-2 (Figure 3C, Movie S1), whether as endogenous or as transfected molecules. However, in  
75 MTE4-14 cells cliffs were also revealed in parental cells devoid of Trop-2, supporting a model of  
76 cliffs as broad containers/activation sites of heterogeneous classes of cell growth inducers, that did  
77 not depend on Trop-2 expression. Cliff membranes were shown to envelope a rim of cytoplasm,  
78 which was easily visualized by calcein and GECO Ca<sup>2+</sup> probes, CFSE or free cytoplasmic GFP and  
79 mCherry, or by cytoplasmic signal transducers (Grb-2-GFP, P-PKC $\alpha$ ) (Figure 3). Parallel evidence  
80 in MDA-MB-231 and MCF-7 human breast, DU-145 prostate cancer cells and in transformed murine  
81 thymus MTE4-14 cells (Figure 1) suggested conservation of cliff features across transformed cell  
82 histotypes.

83 Landscape portraits of membrane cliffs were obtained in living cells through confocal  
84 X,Y,Z,T-stacks of CD9–mCherry transfectants. Cliff height and width were found to recursively  
85 fluctuate over time at the same sites of the cell membrane (Movies S1, S5). CD9 density was  
86 correspondingly found to oscillate over time (Movie S5, pseudocolor representation), first suggesting  
87 that recruitment of protein signal transducers at cliffs followed a cyclic behavior.

88

### 89 **Lipid-normalized signal transducer protein content of membrane cliffs**

90 To tackle quantitative structural-functional issues in cliff generation and dynamics we took advantage  
91 of previously developed fluorescence quantification and imaging technologies<sup>15,22-30</sup>. To prevent  
92 quantitative artifacts due to the inclusion of different membrane volumes in different confocal  
93 sections or cell perimeter sites, we normalized signal transducer density versus membrane lipid  
94 content, using diverse classes of fluorescent lipophilic tracers. These included 3,3'-  
95 dioctadecyloxycarbocyanine perchlorate (DiOC, **18-carbon chain**); 4-(4-(dihexadecylamino)styryl)-  
96 *N*-methylpyridinium iodide (DiA, also known as 4-Di-16-ASP, **16-carbon chain**); 1,1'-didodecyl-  
97 3,3,3',3'-tetramethylindocarbocyanine perchlorate (DiIC, **12-carbon chain**). DiOC, DiA, and DiIC  
98 selectively partitioned into different lipid phases of the cell membranes. DiA induced rapid toxicity  
99 in living cells and was thus abandoned. Composite parametrization of DiOC and DiIC confocal  
100 microscopy signals showed the lowest variance across cell perimeter determinations, and was used  
101 to obtain normalized lipid/protein ratios (Table S1).

102 Lipid-normalized CD9 protein signals were shown to be largely homogeneous throughout the  
103 cell perimeter, with the exception of spikes of signaling protein density at cliffs (149 cliff segments;  
104 9-14 segments per individual cliff), indicating preferential recruitment of protein signal transducers  
105 at these sites (Table S1). Corresponding findings were obtained from 3D reconstructions and Z-stack  
106 analysis of cell populations assessed for endogenous signal transducers and of FP chimera-transfected  
107 living cells.

108

### 109 **Cliffs are signaling platforms**

110 We had previously shown that Trop-1 and Trop-2 transduce  $\text{Ca}^{2+}$  signals upon cross-linking with  
111 anti-Trop monoclonal antibodies (mAb)<sup>14,15</sup>. We thus assessed whether cliffs function as *bona fide*  
112 signaling platforms, i.e. as scaffolds for co-localizing signal transducers, thus facilitating their  
113 interaction<sup>19,20</sup>. This was explored in endogenous Trop-2-expressing breast MDA-MB-231 and in  
114 thymus MTE4-14/Trop-2 transfectants. After addition of 162-46.2 anti-Trop-2 mAb to transformed  
115 cells,  $\text{Ca}^{2+}$  signaling waves were shown to originate from membrane cliffs (Movie S6, Figure 3B),  
116 with a latency time of  $7.5 \pm 1.0$  s (mean  $\pm$  SEM; range: 3.9-15.7 s). The  $\text{Ca}^{2+}$  signals lasted  $81.2 \pm 12.1$  s  
117 (range: 31.4-141.5 s). No signal was elicited in control cells devoid of Trop-2. Trop-2-induced  $\text{Ca}^{2+}$   
118 signals were shown to lead to activation of PKC $\alpha$ , which functions as a pivotal inducer of Trop-2-  
119 induced cell growth<sup>14</sup>. Recruitment of PKC $\alpha$ -EGFP, a fully functional growth-driving molecule, was  
120 found to only occur at cliffs (Figure 2B, Movie S7). PKC $\alpha$ -EGFP membrane recruitment occurred  
121 with a latency time of  $5.0 \pm 0.5$  sec (range: 3.9-7.9 sec) after addition of anti-Trop-2 mAb, and lasted  
122 on average  $55.0 \pm 10.6$  sec (range: 7.9-125.8 sec). This closely corresponds to overall values for PKC $\alpha$   
123 membrane transport/activation<sup>14</sup>, consistent with a model whereby cliffs function as main platforms  
124 for PKC $\alpha$  signaling.

125

### 126 **Space dimensions of cliffs**

127 The spatial features of cliffs were analyzed on human breast MDA-MB-231 and on murine  
128 transformed MTE4-14 cells, over ~50,000 independent confocal microscopy images (Figure 4).  
129 Distribution analysis of these findings showed a reproducible mean cliff length of  $27 \pm 8$   $\mu\text{m}$  across  
130 the different cell types analyzed (Table S2). Hence, cliffs appear orders of magnitude larger than  
131 previously recognized cell membrane signaling platform in living cells<sup>31-36</sup>.

132

### 133 **Cliffs are long-lived, recursive platforms**

134 Cliff lifetimes were investigated in living MTE4-14 cells transfected with signaling protein-FP  
135 chimeras, capturing images at 30-96 sec intervals (308 cliff acquisitions; 20-37 frames per individual

136 cliff) (Figure 4B). This indicated cliff lifespans of  $226\pm 40$  sec (mean $\pm$ SEM) (range: 30-940 sec).  
137 Corresponding findings were obtained using shorter image acquisition times (1.18 sec/frame) under  
138 continuous-recording mode, which prevented artifacts due to movement-related, out-of-focus  
139 shifting of the membrane regions under analysis. Thus, cliff lifetimes appear orders of magnitude  
140 longer than those of previously reported signaling platform in living cells <sup>32,33</sup>.

141 As indicated above, cliffs recursively assemble at conserved sites of the cell membrane  
142 perimeter (Movies S1, S2, Table S2). Wave periods, i.e. the interval between sequential peaks of  
143 protein density at cliffs (Figure 4, Table S2), were  $293\pm 46$  sec (mean $\pm$ SEM) (12 sequential cycles;  
144 range: 70-600 sec). Wave periods thus appeared in the range of cliff lifetimes, suggesting that the  
145 recruitment rates of signal-transducers at the cell membrane drive cliff assembly periodicity. These  
146 findings were confirmed by high frame-rate/continuous-mode recording confocal microscopy.

147 Approximately half of the cliffs were found to completely disappear, to then reappear in a  
148 cyclic manner, while the remaining cliffs oscillated between maximum and minimum dimensions.  
149 The ratio between the maximum and minimum size of individual cliffs in the latter subset appeared  
150 centered around 5-fold (median: 4.94; range: 1.99-15.74; near-median measurements: 10 out of 18  
151 cases) (Table S2), suggesting fine regulation of cliff size over time. The minimum fraction of cell  
152 membrane perimeter occupied by cliffs at any one time was  $\geq 5\%$  (Table S2i-ii).

153

#### 154 **Cell growth-driving kinases are recruited at cliffs**

155 Trop-1 and Trop-2 stimulate cell growth and tumor progression through downstream cytoplasmic  
156 kinases <sup>2,11,14,16,17</sup>. We thus explored whether cliffs were recruitment sites for Trop-activated kinases.

157 PKC $\alpha$ -FP <sup>14</sup> and ERK-FP were shown to dynamically colocalize with Trop-1/Trop-2 at cliffs  
158 (Movie S2, Figure 2B). Endogenous growth-driving kinases followed corresponding patterns. We  
159 utilized to this end 43 different antibodies from independent suppliers, whenever possible as pairs of  
160 independent antibodies for detecting individual target proteins (Material and methods) <sup>11</sup>. In cases of  
161 transfected proteins, e.g. Trops, tetraspanins, care was taken to avoid overexpression of the  
162 transfected plasmids, via selection of expressing cells by flow cytometry for the average levels of  
163 expression detected in cancer cells <sup>14</sup>. Following these procedures, we reproducibly detected  
164 endogenous Ret, Erb-B4, ILK, Akt <sup>16</sup>, Src, Syk, ERK-1 at Trop-2/CD9 sites in MTE4-14/Trop-2 cells  
165 (Figures 4C, 5A). We went on to show that the recruited kinases were phosphorylated at kinase  
166 activation sites under baseline conditions (P-Src, P-ERK-1/2, P-Erb-B4, P-RET, P-Akt, P-PKC $\alpha$ ,  
167 Figures 4C, 5B), indicating cliffs as platforms for kinase function activation. Consistently, higher  
168 levels of kinase activation at cliffs were shown to be induced by treatment with growth factors (GF)  
169 (see below).

170 Comparative analysis of absolute levels of expression and phosphorylation status of receptor  
171 tyrosine kinases (RTK) and of cytoplasmic kinases at cliffs, as compared to non-cliff sites, indicated  
172 that the vast majority of activated/phosphorylated kinases did associate to membrane cliffs (99% of  
173 total membrane content for P-Erb-B4; 91% for P-Ret; 90% for P-PKC $\alpha$ ; 90% for P-Src) (Table S3),  
174 suggesting cliffs as main kinase activation sites at the plasma membrane.

175 PKC $\alpha$  is recruited to the cell membrane upon Ca<sup>2+</sup> signaling (Movies S6, S7), and is  
176 subsequently activated by phosphorylation at S657<sup>14</sup>. We thus asked whether recruitment at cliffs  
177 preceded PKC $\alpha$  activation. We tackled this issue by assessing whether PKC $\alpha$  kinase activity was  
178 required for cliff localization or was dispensable. We found that cliff recruitment was kinase activity–  
179 independent, as a dominant-negative, kinase-inactive K368R PKC $\alpha$ -GFP<sup>37</sup> was efficiently recruited  
180 at cliffs (Movie S8).

181 We asked a corresponding question for Trop-2 recruitment at cliffs. Multiple inactive Trop-2  
182 mutants were generated<sup>14</sup>. These included S303A, a mutation of the acceptor site of phosphorylation  
183 by PKC $\alpha$ , which prevents PKC $\alpha$  recruitment at cliffs. Deletion of the HIKE region ( $\Delta$ HIKE), a  
184 regulatory site for protein-protein and protein-phospholipid interactions<sup>38,39</sup>, correspondingly  
185 prevented Trop-2 from recruiting PKC $\alpha$  to the cell membrane, despite preserving Trop-2 induction  
186 of intracellular Ca<sup>2+</sup> waves<sup>14</sup>. Trop-2 mutants of four cytoplasmic tail E to K (E->K) and deletion-  
187 mutants of the entire cytoplasmic tail ( $\Delta$ cyto) were correspondingly assessed. None of the tested  
188 mutants detectably affected Trop-2 recruitment to cliffs (Figure 6), first suggesting that functional  
189 signaling of Trop-2 was not required for recruitment at cliffs.

190 Cytoplasmic tail mutagenesis (S303A,  $\Delta$ HIKE,  $\Delta$ cyto) abolishes the capacity of Trop-2 to  
191 induce cell growth<sup>10,14</sup>. Extra-cytoplasmic cleavage of Trop-2 by ADAM10 is required to activate  
192 Trop-2 as a growth inducer<sup>10</sup>. We thus explored whether Trop-2 recruitment at cliffs was affected  
193 by mutagenesis of the ADAM10 cleavage site (R87A-T88A<sup>10</sup>). R87A-T88A Trop-2 mutants were  
194 efficiently transported at cliff sites (Figure 6), albeit unable to signal for cell growth<sup>10</sup>, supporting  
195 the notion that recruitment at cliffs does not require Trop-2 activation.

196

### 197 **Cliff signaling underlies induction of cell growth**

198 Trop-2 drives signaling for cell growth and shRNAs for *TROP2* abolish the growth of Trop-2-  
199 expressing cells<sup>14</sup>. Correspondingly, shRNA inhibition of endogenous Akt<sup>16</sup>, CD9 or PKC $\alpha$ <sup>14</sup>  
200 prevent Trop-2 signaling for growth, revealing a tight interplay of signaling super-complex  
201 components that are co-recruited at cliffs. The actin cytoskeleton informs EGF uptake and modulates  
202 EGF receptor activation and downstream signaling<sup>40</sup>. Activated RTK and Ser/Thr protein kinases  
203 are engaged at cliffs, leading us to challenge a broader model, i.e. whether GF induce cliff assembly,

204 to then induce cell growth. Fetal calf serum/growth-factor deprivation of parental MTE4-14 cells was  
205 shown to lead to the progressive disappearance of cliffs, and to a parallel reduction of endogenous P-  
206 PKC $\alpha$  and CD9 membrane levels after 24 h to 48 h starvation, and to the arrest of cell proliferation  
207 (Table S3, Figures 7, S2).

208 Addition of serum to serum-starved HCT116 colon cancer cells led to the recovery of Trop-  
209 2 synthesis and transport to the cell surface after 1 h exposure of cells starved for 48 h. Trop-2 levels  
210 subsequently reached those in control cells in  $\approx$ 8 hours (Figure 7D). Purified FGF-1, PDGF, EGF,  
211 HGF, IGF-1, SCF and VEGF were next tested for their capacity of inducing membrane cliffs in  
212 serum-starved cells and for driving cell growth. A 30 min stimulation with 1, 10 or 100 nM PDGF,  
213 FGF-1 or EGF sufficed to induce cliff formation and cell growth (Figures 7C, S2). HGF, IGF-1  
214 showed a lesser impact, whereas SCF, VEGF had essentially no effect, on both cliff formation (Table  
215 S3B,C) and on cell growth (Figures 7C, S2), supporting a model whereby cliff formation by  
216 GF/disruption by GF deprivation parallel induction/ablation of cell growth, respectively. Trop-2  
217 expression was shown to interact with CD9 expression levels and with response to GF (Figure S2B).  
218 Consistent with the GF specificity of cliff induction and of cell growth triggering, Trop-2 expression  
219 was shown to antagonize, in a dose-response manner, cell growth inhibition by 0.1  $\mu$ M to 10  $\mu$ M  
220 Erlotinib, which largely acts as EGFR<sup>41</sup> and FGFR1-4<sup>42</sup> inhibitor. On the other hand, Trop-2 did not  
221 antagonize cell growth inhibition by Sorafenib, which largely acts as Ser/Thr CDK and Tyr VEGFR1-  
222 3 inhibitor<sup>41,42</sup> (Figure 7B).

223 Thus, specific GF induce formation of membrane cliffs. A mixture of FGF-1, PDGF and EGF  
224 had a stronger impact than any GF alone, and approximately doubled both the number of cliffs  
225 observed in cells grown in conventional serum-supplemented medium and cell proliferation (Figure  
226 7C), suggesting that multiple growth factors exert an additive effect on cliff assembly and signaling.  
227 An extended analysis is presented in Table S3B, whereby CD9/P-PKC $\alpha$  cliff signal intensity versus  
228 occupied perimeter fraction versus growth factor stimulation was performed on a cell-by-cell basis,  
229 on  $\approx$ 2440 cells, across 122 image panels, recorded as correlated pairs of fluorescence channels, and  
230 on additional  $\approx$ 1680 cells, across 84 single-fluorescence validation panels.

231 These findings highlighted distinct time-scales for the periodic assembly/disassembly of cliffs  
232 during steady-state conditions ( $\sim$ 200 sec), versus *de novo* formation as induced by GF (1-8 hours).  
233 The transport of Trop-2 to the cell surface was measured after starvation/refeeding (flow cytometry  
234 analysis of living HCT-116 cells). Cell surface Trop-2 was detectable after one hour of serum re-  
235 feeding in 22% of the cells, but reached baseline levels in the majority of the cells in  $\geq$ 8 hours (Figure  
236 7D). Trop-2 neosynthesis, as measured by subtracting membrane-only staining from whole cell  
237 signals, was shown to account for a considerable fraction of recovery kinetics, indicating that there



238 is a requirement for signal transducer neosynthesis during cliff recovery after starvation, which  
239 significantly extends the kinetics of cliff generation, versus baseline control conditions.

240

### 241 **The $\beta$ -actin cytoskeleton informs cliff dynamics**

242 Disruption of actin microfilaments, but not of microtubuli or intermediate filaments, was shown to  
243 affect the localization of Trop-1/Ep-CAM at cell-cell boundaries <sup>43</sup>. Our findings showed that  
244 activation of the Trop-2 membrane super-complex remodels the  $\beta$ -actin/ $\alpha$ -actinin cytoskeleton  
245 through cofilin-1, annexins A1/A6/A11 and gelsolin <sup>14</sup>. We show here that co-recruitment of ezrin,  
246 moesin, fascin,  $\alpha$ -actinin, cortactin, vinculin and Trop-2–GFP occurs at cliffs ([Figure 8, S3](#)). Co-  
247 transfection of MTE4-14 cells with the  $\beta$ -actin cytoskeleton marker Lifeact–mRFP1 and Trop-2–  
248 GFP showed extensive co-recruitment of actin cytoskeleton and Trop-2–GFP at cliffs ([Movie S9](#)).  
249 Analysis of endogenous molecules through phalloidin-FITC for  $\beta$ -actin and mAb-Alexa633 for Trop-  
250 2 showed a corresponding colocalization at cliffs in fixed MTE4-14 cell transfectants ([Figure S3](#)).  
251 Crosslinking of Trop-2 in living cells using the 162-46.2 mAb induced  $\beta$ -actin polymerization in  
252 parallel to  $\text{Ca}^{2+}$  ([Movie S10](#)) and PKC $\alpha$  signaling ([Movie S7](#)). Induced  $\beta$ -actin polymerization  
253 showed a latency time of  $10.2 \pm 2.9$  sec (mean $\pm$ SEM; range: 3.9-19.7 sec) and a plateau after  $55.0$   
254  $\pm 13.5$  sec (range: 23.6-90.4 sec).

255 We thus assessed whether drug-induced depolymerization of the  $\beta$ -actin cytoskeleton affected  
256 cliff formation. At variance with tetraspanin microdomains <sup>44,45</sup>, treatment with latrunculin B or  
257 cytochalasin D (which bind to G-actin and prevent polymerization) led to the disappearance of PKC $\alpha$ -  
258 GFP and CD9-mCherry-hosting membrane cliffs ([Figure 8, Movie S11](#)). Dose-response treatments  
259 of MTE4-14/Trop-2 transfectants revealed that 10 nM cytochalasin D sufficed to disrupt cliffs and  
260 to revert the growth rate of Trop-2 transfectants to the growth rate of control cells ([Figure 8A](#)). Cliffs  
261 and Trop-2-induced cell growth were rescued after washout of cytochalasin D, in parallel to the  
262 recovery of the actin cytoskeleton ([Figure 8D](#)).

263 Vesicular traffic of growth-regulatory receptors to the cell surface depends on microtubules,  
264 which are orchestrated by merlin through a Rac/MLK/p38 (SAPK) pathway <sup>46</sup>. Tubulin-binding  
265 inhibitors of microtubule polymerization (nocodazole, colchicine) efficiently inhibited microtubule  
266 assembly. However, they had no detectable impact on cliff formation ([Movie S12, Figure 8E](#)), overall  
267 suggesting no involvement of the microtubule cytoskeleton in cliff scaffolding.

268 Membrane recruitment of myosin IIa–mTFP1 was detected at later times points ( $38.9 \pm 7.6$   
269 sec; range: 11.8–70.7 sec) than that of polymerized  $\beta$ -actin, and lasted for considerably longer times  
270  $179.5 \pm 7.7$  sec (range: 161.1-192.6 sec). Consistent with a distinct functional role of myosin versus  
271  $\beta$ -actin in the generation of cliffs, the myosin inhibitor blebbistatin had no influence on cliff formation

272 (Figure 8F). Taken together, these findings indicated that cliff formation distinctly depend on the  $\beta$ -  
273 actin cytoskeleton, and that cliff disappearance and loss of cliff signaling capacity is not an obligate,  
274 nonspecific response to any cytoskeletal perturbation.

275

## 276 **Conclusions**

277 Our findings indicate cliffs as novel, macroscopic signaling platforms, that recruit and activate drivers  
278 of cell growth. Cliffs were induced by GF, acted as sites of kinase  
279 recruitment/phosphorylation/activation and as sites of origin of  $\text{Ca}^{2+}$  signaling. Signaling competence  
280 for cell growth was acquired through the co-recruitment of trans-membrane (RTK, CD9, CD81,  
281 CD98, Co-029, CD316, Trop-1, Trop-2), and cytoplasmic (PKC $\alpha$ , ERK, Akt, Src, Syk, ILK, ezrin)  
282 signal transducers to cliffs. On the other hand, disruption of cliff assembly by GF deprivation or by  
283  $\beta$ -actin depolymerization abolished signaling for cell growth. Loss-of-function mutagenesis of Trop-  
284 2 and PKC $\alpha$  did not prevent their recruitment at cliffs, suggesting a model whereby inactive signaling  
285 molecules are recruited at cliffs, for subsequent activation by specific interactors.

286 Cliffs were shown to be  $\approx 27$   $\mu\text{m}$ -long segments of the cell membrane, that recursively formed  
287 over hundreds of seconds at conserved sites of the cell perimeter. Thus, cliffs appear orders of  
288 magnitude larger than any previously recognized cell membrane signaling platform in living cells<sup>31-</sup>  
289 <sup>36</sup>. Cliff lifetimes correspondingly appeared orders of magnitude longer than those of any previously  
290 reported signaling platform in living cells<sup>32,33</sup>, suggesting cliffs as high-dimensional signaling  
291 platforms for cell growth in normal, living cells<sup>31,47,48</sup>.

292



293 Box 1

294

- 295 • Cliffs are macroscopic, recursive cell membrane platform that trigger signals for cell growth.
- 296 • Cliffs are two-leaflet membrane elevations, up to 1.5  $\mu\text{m}$  tall,  $\approx 27 \mu\text{m}$  wide.
- 297 • Cliffs are long-lived membrane platforms  $226 \pm 40$  sec (mean  $\pm$  SEM) (range: 30-940 sec).
- 298 • Cliffs recur over long time frames  $293 \pm 46$  sec (mean  $\pm$  SEM) (12 sequential cycles; range:  
299 70-600 sec), at essentially immobile sites of cell edges.
- 300 • Cliffs are co-recruitment activation sites of multiple classes of signal transducers for cell  
301 growth.
- 302 • Cliffs are sites of phosphorylation/activation of growth-inducing protein kinases and are  
303 trigger sites of calcium waves.
- 304 • Cliffs are induced by growth factors and disappear with serum starvation.
- 305 • Cliffs selectively depend on the  $\beta$ -actin cytoskeleton and  $\beta$ -actin depolymerization abolishes  
306 cliff signaling for cell growth.
- 307

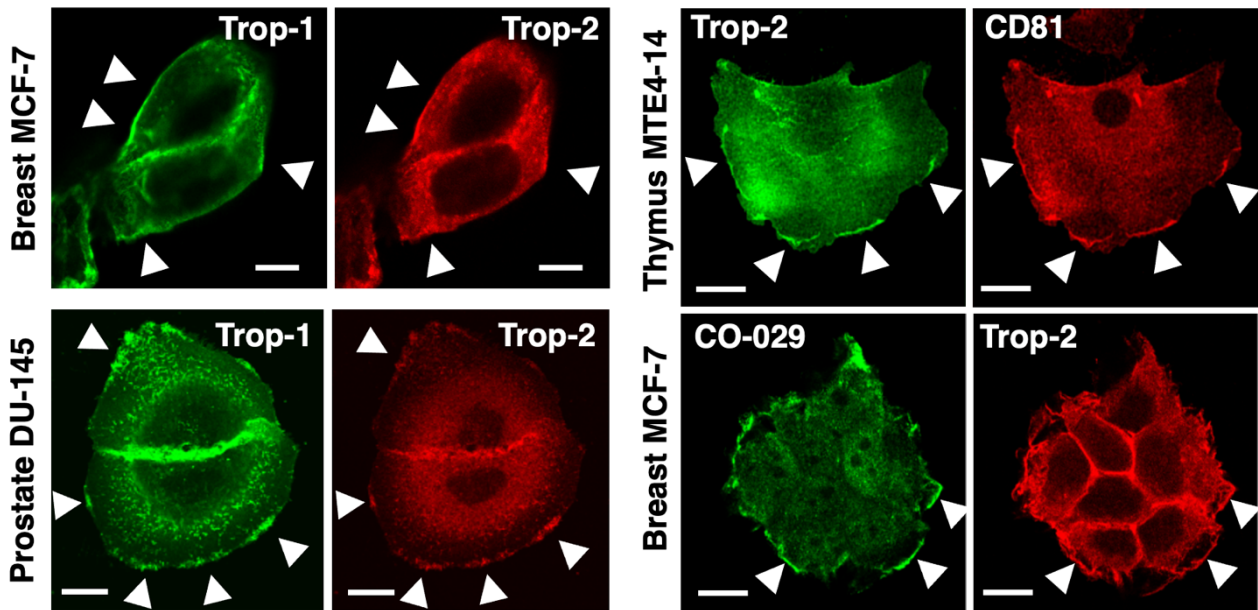

308

309

310 **Figure 1. Trop-1, Trop-2, CD81, CO-029 are co-recruited at distinct membrane segments.**

311 Breast MCF-7, prostate DU-145 cancer cells and transformed MTE4-14 thymus cells were analyzed  
312 for expression and localization of signal transducers by confocal microscopy. White arrowheads  
313 indicate colocalization at distinct membrane segments.

314 (*left*) Trop-1 and Trop-2 were revealed with the HT29/26-Alexa488 and T16-Alexa633 mAb,  
315 respectively. (*right*) Colocalization analysis of Trop-2 with the CD81 and CO-029 tetraspanins.

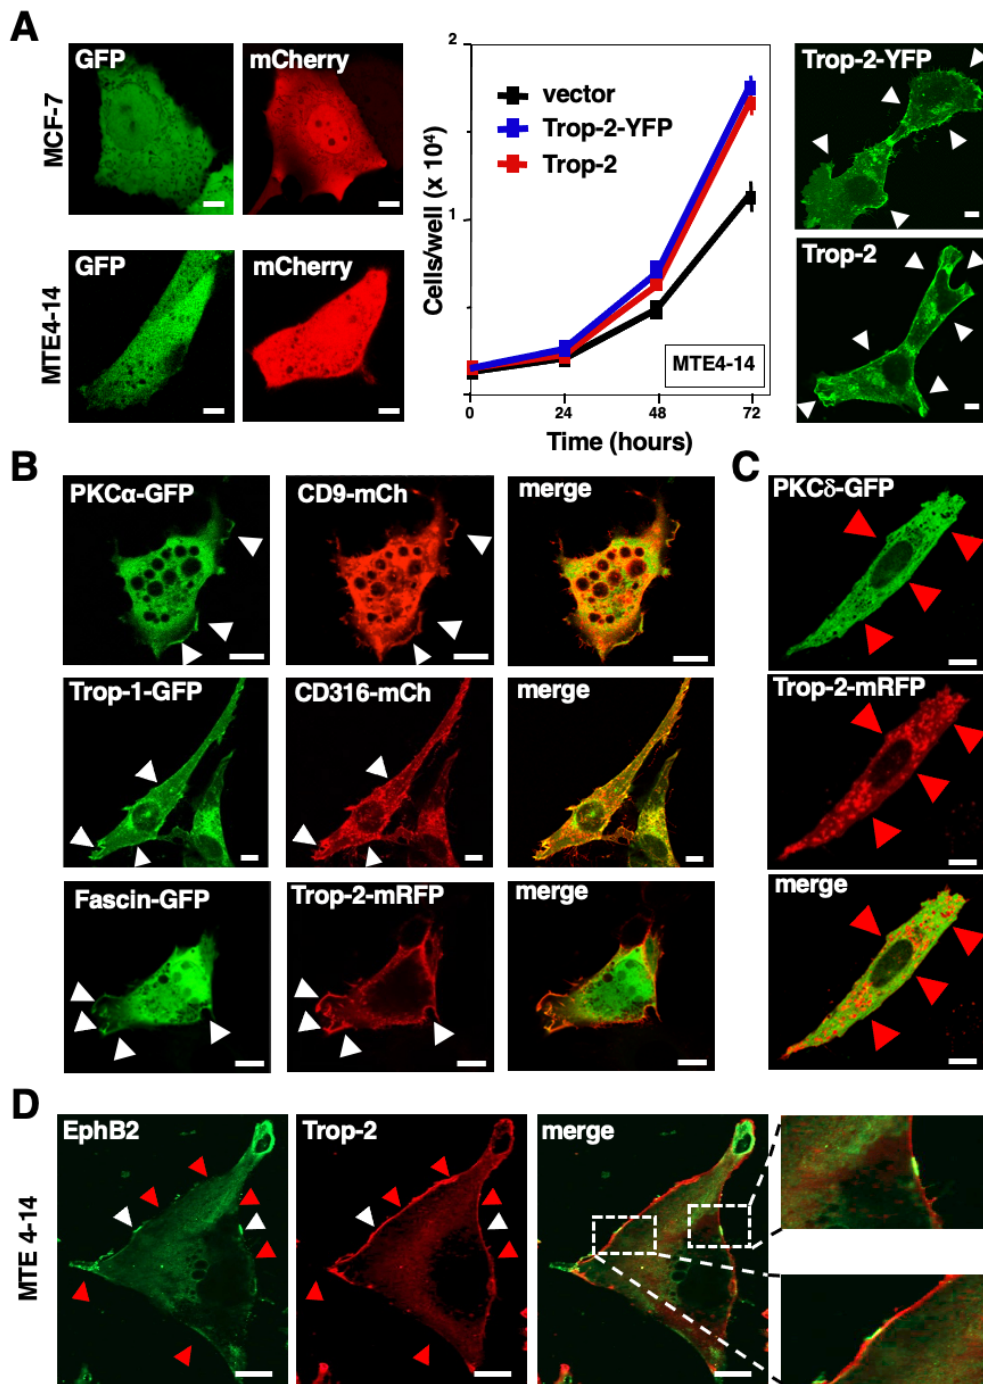

316

317 **Figure 2. Distinct signaling molecules are co-recruited at confined cell membrane regions.**

318 Thymus MTE4-14 and breast MCF-7, MDA-MB-231 cells were transfected with signaling molecule-  
319 FP chimeras or Ca<sup>2+</sup> indicators. Membrane recruitment and impact on cell growth were assessed.  
320 White arrowheads indicate colocalization of the signal transducers that were challenged. Red  
321 arrowheads indicate absence thereof.

322 (A) (left) Control transfectants show absence of mCherry or GFP tag localization to the cell  
323 membrane in MCF-7 and MTE4-14 cells. (mid) The Trop-2-YFP chimera was shown to induce cell  
324 growth just as well as wild-type Trop-2. Data are presented as mean $\pm$ SEM. (right) Parallel

325 localization of Trop-2–YFP chimeras versus wild-type Trop-2, as revealed by T16 anti-Trop-2 mAb-  
326 staining in MTE4-14 transfectants. **(B)** Horizontal panel strips show membrane colocalization of  
327 PKC $\alpha$ –GFP and CD9–mCherry, or Trop-1–GFP and CD316–mCherry, or Fascin–GFP and Trop-2–  
328 mRFP in MTE4-14 transfectants. **(C)** Lack of colocalization of Trop-2–mRFP versus PKC $\delta$ –GFP in  
329 MTE4-14 cells. Scale bars, 10  $\mu$ m. **(D)** Absence of colocalization of Trop-2 with EphB2 at cliffs.  
330 ROI magnify details of different membrane localization regions. Bars, 10  $\mu$ m.  
331

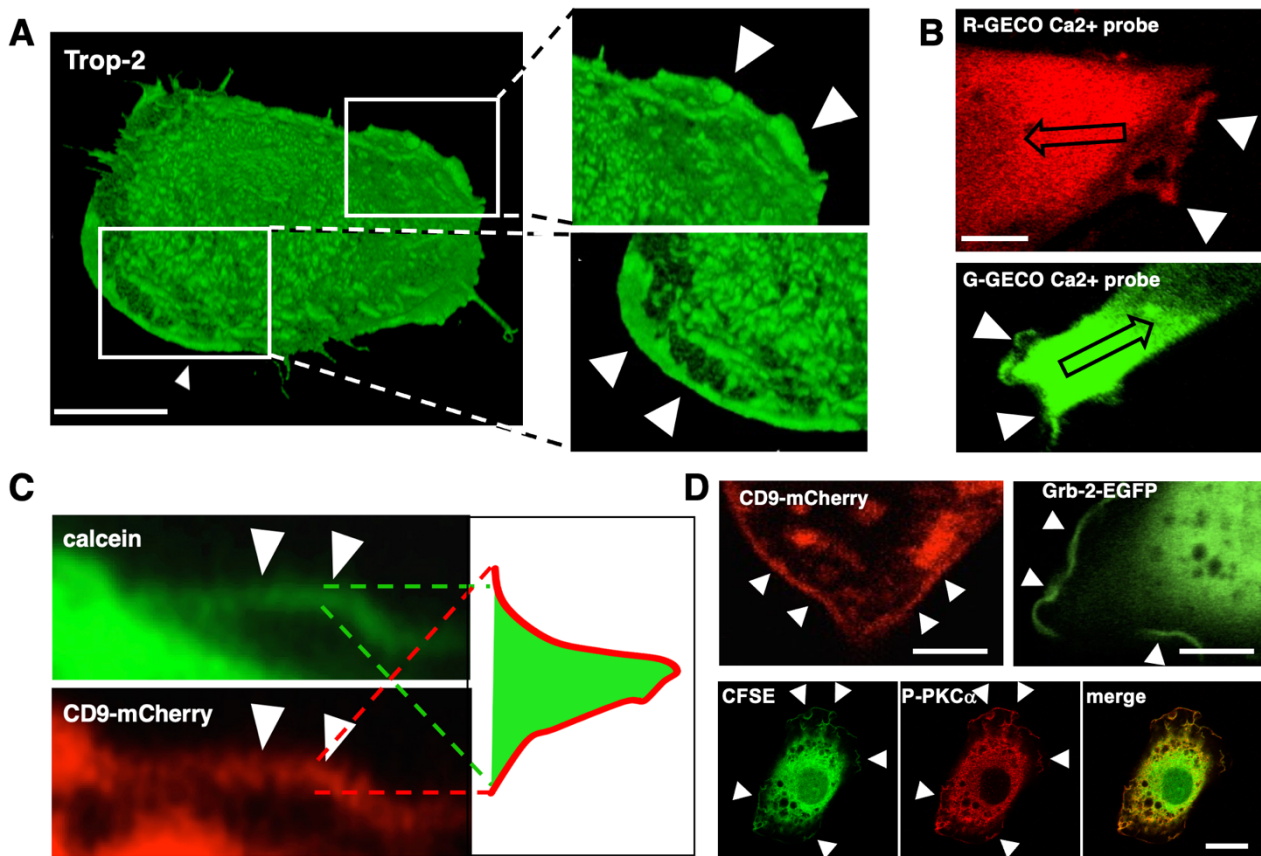

332

333

334

335

336

337

338

339

340

341

342

343

344

345

346

347

348

349

**Figure 3. 3D structure of membrane cliffs.** (A) Confocal Z-stack 3D-reconstruction of a Trop-2-expressing MTE4-14 living cell stained with the T16 anti-Trop-2 mAb (outside membrane staining). (insets) Magnified regions of interest (ROI, white rectangles). Membrane cliffs are indicated by arrowheads. Bar, 5  $\mu$ m. The full dataset is presented in [Movie S3](#). (B) MDA-MB-231 cells and MTE4-14/Trop-2 transfectants super-transfected with the  $\text{Ca}^{2+}$  indicators G-GECO and R-GECO, respectively, to visualize cell membrane cliffs. The pictures are Movie frames taken at the time of origin of cytoplasmic  $\text{Ca}^{2+}$  waves, elicited by mAb-induced Trop-2 cross-linking<sup>15</sup>. The direction of propagation of the  $\text{Ca}^{2+}$  waves is indicated by the arrows. The full dataset is presented in [Movie S6](#). Scale bars, 5  $\mu$ m. (C) MTE4-14 cells transfected with CD9-mCherry and treated with calcein as a cytoplasm tracer. Arrowheads indicate the same cliff region in the two paired panels. Top: The rim of cytoplasm contained in the cliff is indicated by the calcein signal. Bottom: CD9-mCherry labels the external membranes of the cliff. A cliff model is depicted in the right side of the cartoon. (D) (top) MTE4-14 cells transfected with CD9-mCherry or with Grb2-EGFP. (bottom) The cytoplasm of MTE4-14 cells was labeled with CFSE 5  $\mu$ M in PBS 15 min at 37°C (green). Endogenous P-PKC $\alpha$  was stained with Alexa546 mAb (red). Merged signals are indicated on the right. Membrane cliffs are indicated by arrowheads. Bars, 5  $\mu$ m.



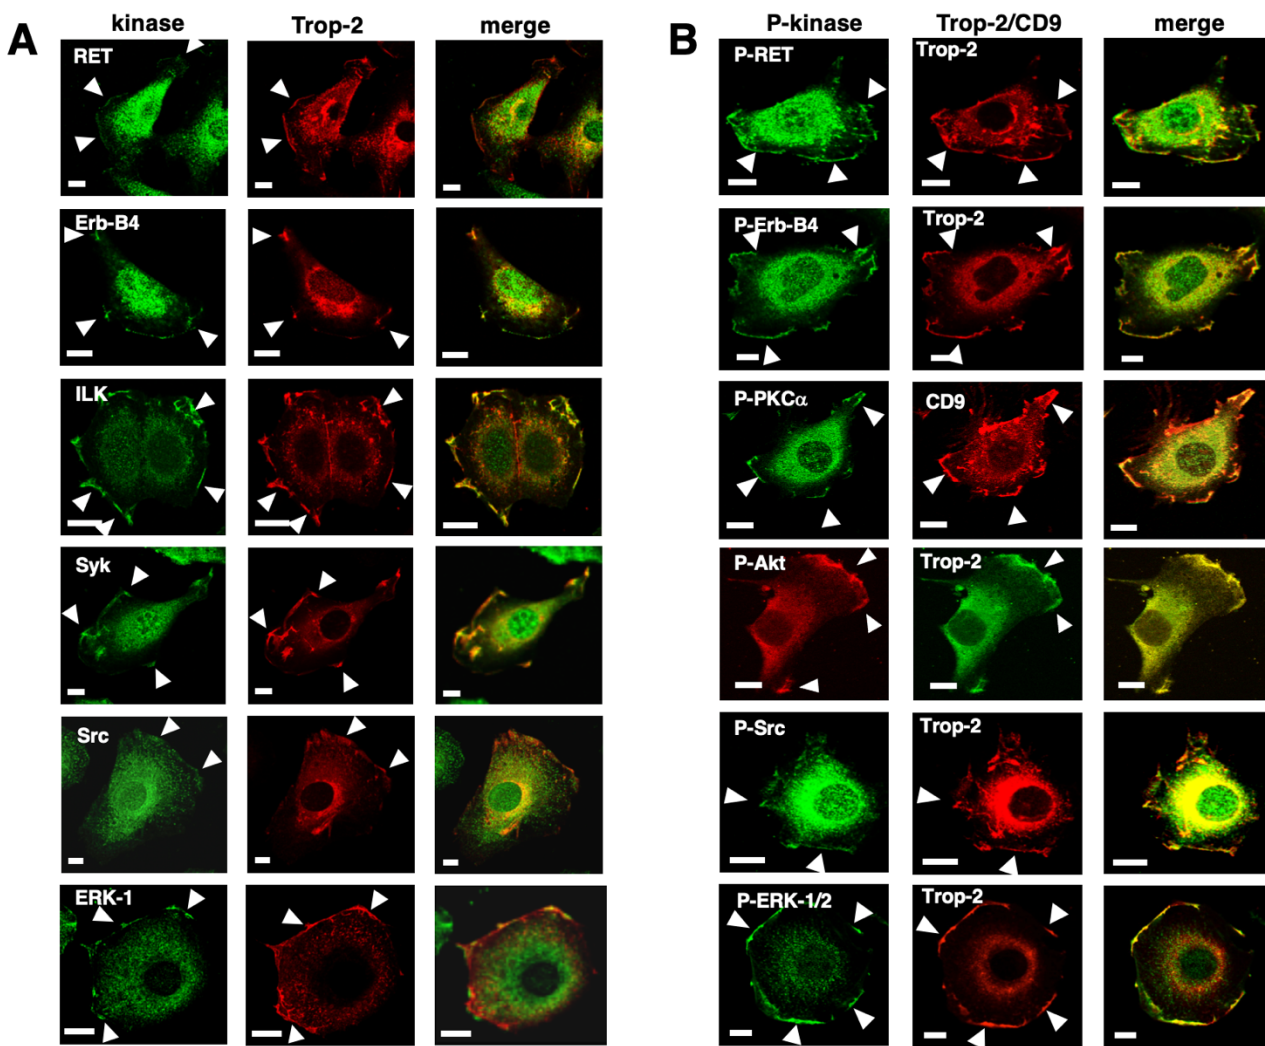

350

351

352 **Figure 4. Growth-inducing kinases are recruited and activated at cliffs.** Endogenous cytoplasmic  
353 kinases were analyzed by mAb-staining immunofluorescence confocal microscopy. Trop-2 and CD9  
354 were utilized as cliff tracers and for colocalization analysis. Representative single-plane images of  
355 Z-stack reconstructions are shown. Arrowheads indicate areas of co-recruitment of pairs of signal  
356 transducers at membrane cliffs.

357 (A) MTE4-14/Trop-2 transfectants were stained for Trop-2 (*red*) and for RET, Erb-B4, ILK, Syk,  
358 ERK-1, as indicated (*green*). Scale bars, 10  $\mu\text{m}$ . (B) MTE4-14/Trop-2 transfectants were stained for  
359 Trop-2 or endogenous CD9 and for the activated/phosphorylated P-Src, P-ERK-1/2, P-Erb-B4, P-  
360 RET, P-PKC $\alpha$ , P-Akt as indicated. Scale bars, 10  $\mu\text{m}$ .

361

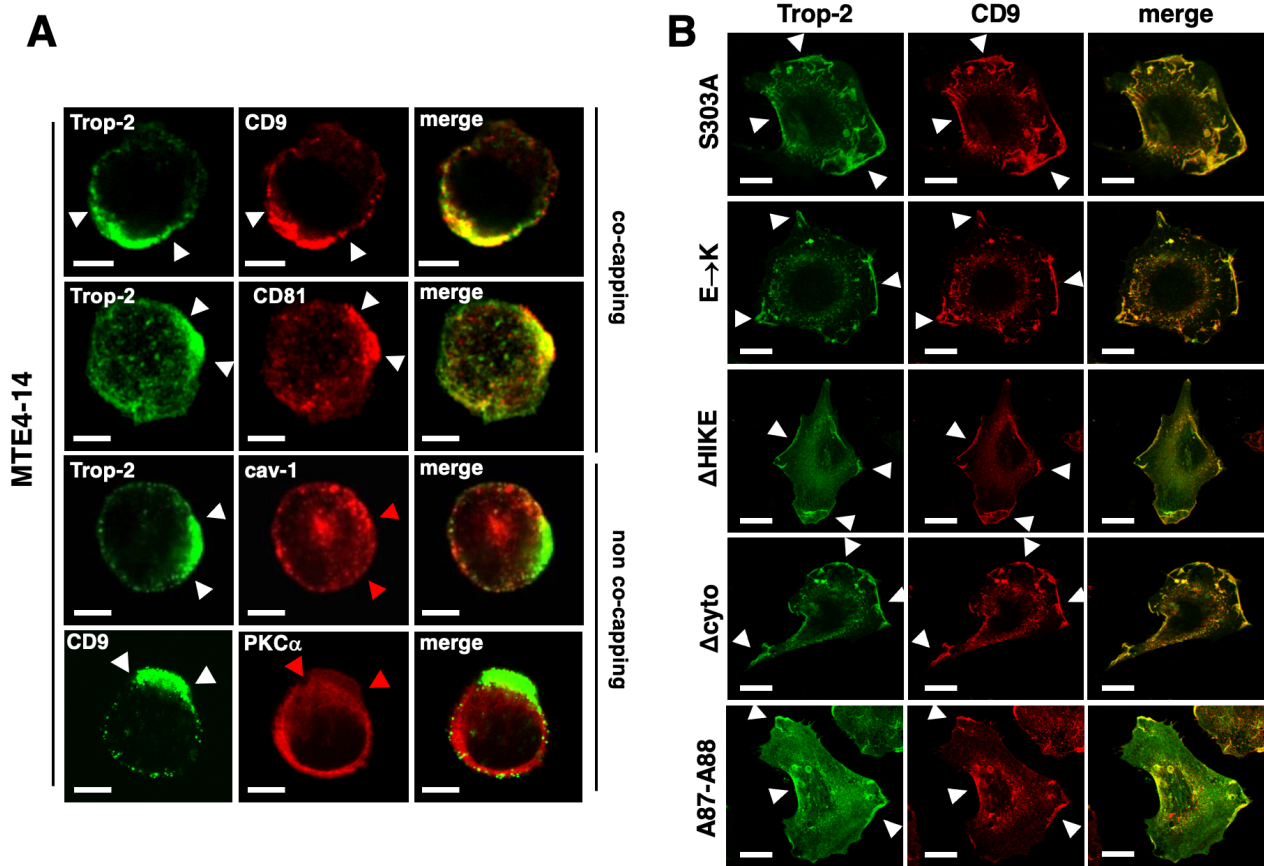

362

363 **Figure 5. Selective co-recruitment of signal transducers at cliffs.** (A) (top) Co-capping of Trop-2  
 364 with CD9 and CD81 in MTE4-14 cells. (bottom) Lack of Trop-2 co-capping with caveolin-1 and  
 365 control PKC $\alpha$ . White arrowheads indicate the edges of the capped regions. Red arrowheads indicate  
 366 the regions with lack of co-capping. Bars, 5  $\mu$ m. (B) White arrowheads indicate colocalization of  
 367 Trop-2 and CD9 at cliffs. Trop-2 mutants were generated as described<sup>14</sup>. Mutants of the cytoplasmic  
 368 region included: S303A: mutation of the PKC $\alpha$  phosphosite. E→K: mutation of the four E in the  
 369 cytoplasmic tail to K.  $\Delta$ HIKE: deletion of the HIKE region.  $\Delta$ cyto: deletion of the cytoplasmic tail.  
 370 A87-A88: R87A and T88A mutants of the ADAM10 extracytoplasmic cleavage site<sup>10</sup>. None of the  
 371 tested mutants detectably affected Trop-2 recruitment at cliffs. Bars, 5  $\mu$ m.

372

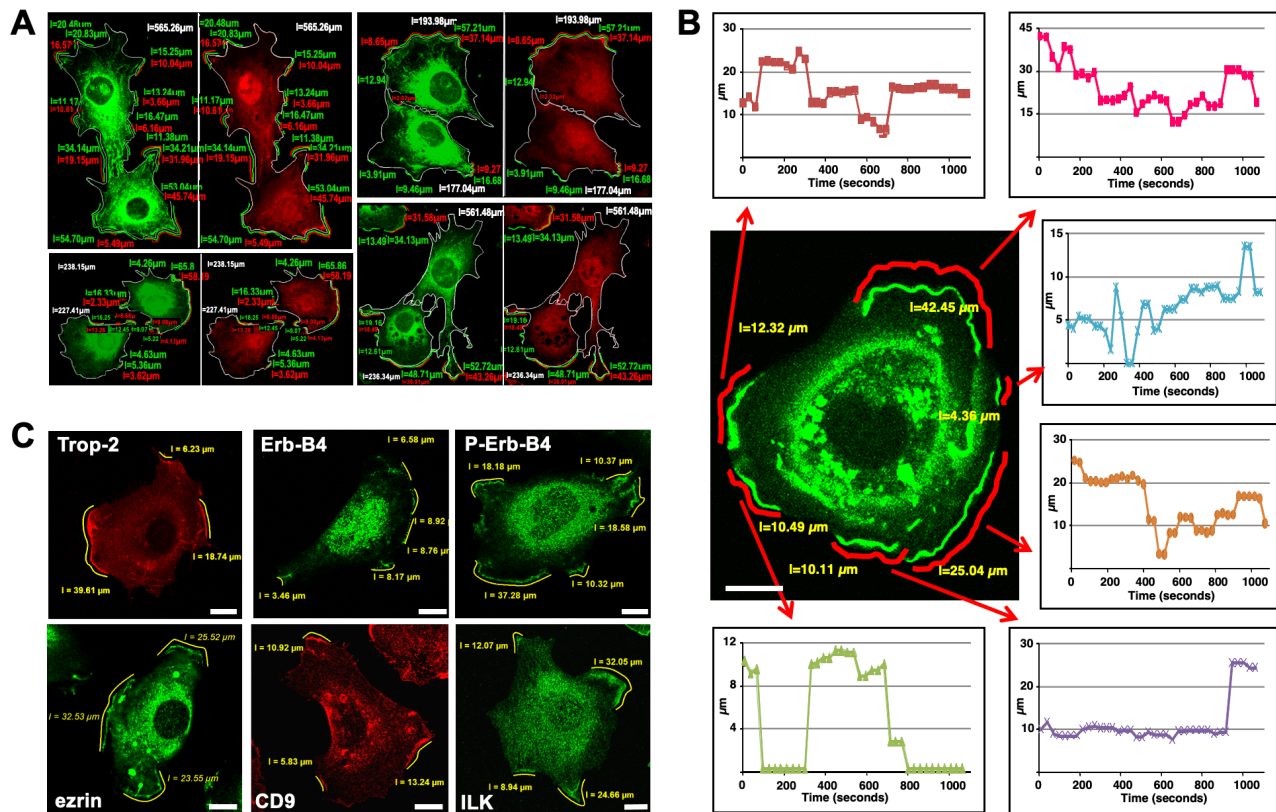

373

374

375

376

377

378

379

380

381

382

383

384

385

**Figure 6. Space and time dimensions of membrane cliffs.** (A) Analysis of membrane cliff size. Yellow stripes: overlaid 'rulers' were generated by the LSM Image Browser 4.0 software. Cliff length ( $\mu\text{m}$ ) was estimated by combining the overlay and measure routines. (B) Time-lapse analysis of membrane cliff size over time. The full data-set is presented in Table S2. Analysis of cliff space-time transitions was performed on individual MTE4-14 living cells transfected with a Trop-2-EGFP chimera. Movies were recorded using the Zeiss LSM 510 3.0 software. Pixel residence time was set at 1.60  $\mu\text{s}$  to 3.10  $\mu\text{s}$ ; image format was 1024x1024 pixels at 8 bit pixel depth. Images were captured at 30 s to 96 s intervals. Individual platform lengths (red stripes) are plotted as graphs versus time. Bar, 5  $\mu\text{m}$ . (C) Cliff size was estimated for membrane-recruited Trop-2, CD9, Erb-B4, phospho-Erb-B4 (P-Erb-B4), ezrin, ILK. Measured cliff length in  $\mu\text{m}$  is indicated. Bars, 5  $\mu\text{m}$ .



386

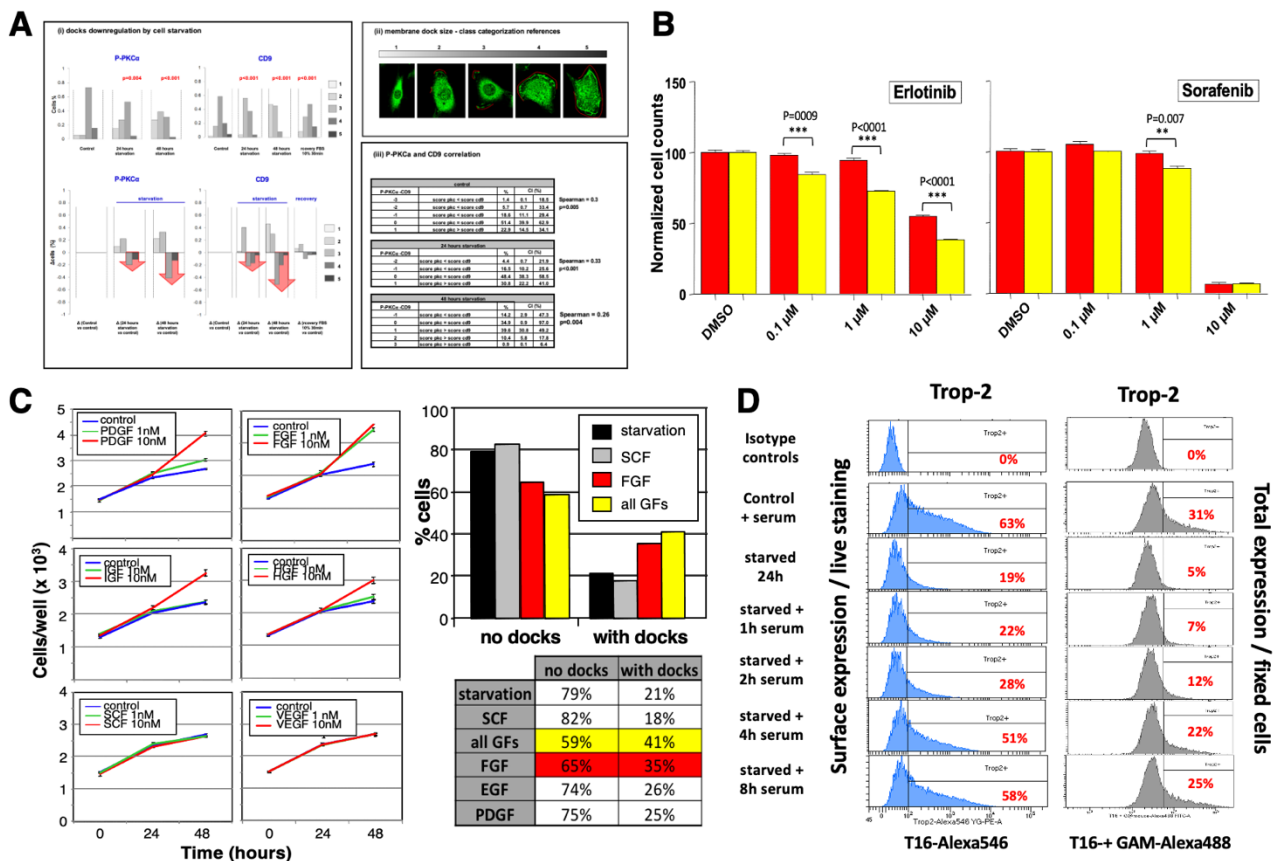

387

388

389 **Figure 7. Membrane cliff and cell growth induction by GF.** (A) MTE4-14 cells were growth  
 390 factor-starved (0.1% serum) for 24 h or 48 h. After treatment, cells were fixed and stained. Co-  
 391 recruitment of endogenous P-PKC $\alpha$  and CD9 at cliff sites was quantified by image analysis. (i) (top)  
 392 Cells were classified (classes 1-5) according to the levels of expression of p-PKC $\alpha$  or CD9 at cliffs.  
 393 (bottom) Histograms of differential class distributions of treated versus control cells. (ii) Intensity  
 394 scores were computed by multiplying perimeter values of regions containing P-PKC $\alpha$  (length of  
 395 cliffs; highlighted in red) (5=entire cell perimeter; 1=no platforms) to intensity values (5=highest  
 396 intensity; 1=undetectable); the square root of the product was used for cell categorization. (top right)  
 397 representative cells for the five perimeter score classes are shown. (i, bottom panel; iii) Correlation  
 398 between p-PKC $\alpha$  and CD9 across the different groups. To highlight score trends, the score of CD9  
 399 was subtracted from the score of p-PKC $\alpha$ . Results were then classified as above or below zero.  
 400 Spearman's rank correlation coefficients and P values are indicated. The full datasets and comparison  
 401 statistics are presented in Table S3.

402 (A) P-PKC $\alpha$  and CD9 membrane localization levels upon cell starvation and serum-induced  
 403 recovery. (B) Inhibition of cliff-induced cell growth by kinase inhibitors. Scale bars: normalized  
 404 cell/well numbers at 72 hours after seeding. Red: Trop-2 transfectants. Yellow: vector-alone

405 transfectants. P values (ANOVA) of Trop-2 versus control cells are indicated; (*left*) Erlotinib as  
406 EGFR<sup>41</sup>, FGFRs<sup>42</sup> inhibitor; (*right*) Sorafenib as VEGFRs inhibitor<sup>41,42</sup>. Trop-2 expression  
407 antagonized cell growth inhibition by Erlotinib, but not that by Sorafenib (dose-response: 0.1  $\mu$ M to  
408 10  $\mu$ M). (C) (*left*) Growth curves of serum-starved MTE4-14 cells, rescued by treatment with GF.  
409 PDGF and FGF-1 efficiently induced cliffs and cell growth. HGF, IGF-1 showed lesser impact on  
410 both cliffs and cell growth, SCF, VEGF had no significant effect on either parameter. (*right*)  
411 Percentage of cells with or without membrane cliff formation, as induced by 24 h exposure to the GF  
412 indicated, 10 nM. Cliffs were visualized by staining for P-PKC $\alpha$ . The largest induction was by the  
413 mixture of EGF, FGF, PDGF ('all GFs') (in 41% of cells). The largest induction by a single GF was  
414 by FGF (in 35% of cells). (D) GF-induced recovery of Trop-2 synthesis and transport to the cell  
415 surface. Cells in culture were starved in 0.1% serum for 24 h. Serum addition triggered both Trop-2  
416 synthesis (gray profiles; total Trop-2 in fixed cells) and Trop-2 transport to the cell surface (blue  
417 profiles; cell membrane-only staining of live cells). The slope of global synthesis of Trop-2 and  
418 transport to the cell membrane over time indicated faster transport recovery versus synthesis.  
419 Progressive recovery of membrane Trop-2 levels was reached after  $\geq 8$  h serum treatment.  
420

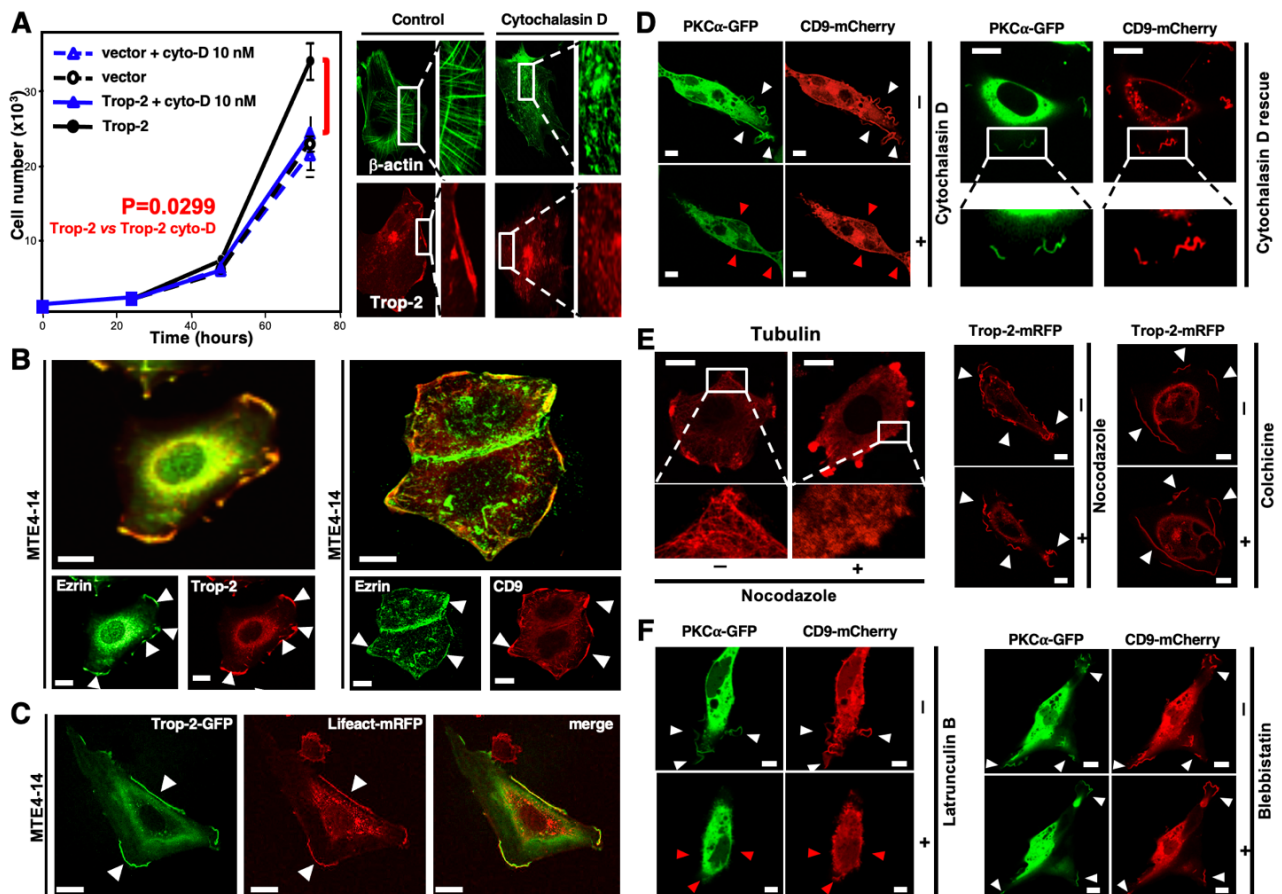

421  
422

423 **Figure 8. β-actin informs cliff structure and function.** MTE4-14 cells were analyzed for  
424 colocalization of signal transducers with cytoskeleton components in resting cells and upon  
425 disruption of β-actin (cytochalasin D, latrunculin B), tubulin (colchicine, nocodazole), myosin  
426 (blebtatin) assemblies. Signal transducer colocalization at cliffs is indicated by white arrowheads.  
427 Red arrowheads indicate no colocalization of signal transducers or loss of it upon cytoskeleton  
428 disruption.

429 (A) Growth curves of MTE4-14 cells transfected with Trop-2 or empty vector, treated with 10 nM  
430 cytochalasin D (cyto-D). Growth curves were compared by two-way ANOVA, with Bonferroni  
431 correction. Data are presented as mean±SEM. (right) Phalloidin-FITC-staining of β-actin (top, green)  
432 and Alexa633-mAb staining of Trop-2 (bottom, red) show loss of β-actin polymerization and of  
433 membrane cliffs upon treatment with cytochalasin D. (B) Trop-2 and CD9 colocalize with ezrin at  
434 cliffs. Scale bars, 10 μm. (C) Co-transfection of MTE4-14 cells with the β-actin cytoskeleton marker  
435 Lifeact-mRFP1 and Trop-2-GFP showed extensive co-recruitment of actin cytoskeleton and Trop-  
436 2-GFP at cliffs. The full dataset is presented in [Movie S4](#). Scale bars, 20 μm. (D-F) Colocalization  
437 of PKCα-GFP and CD9-mCherry in MTE4-14 cell transfectants was explored in resting cells and  
438 upon cytoskeleton disruption. (D) (left) Cytochalasin D treatment. (right) Recovery of membrane

439 platforms 24 h after removal of cytochalasin D. **(E)** Disruption of tubulin organization after treatment  
440 with nocodazole (*left*) or colchicine (*right*) had no effect on cliffs. Tubulin was stained with anti-  
441 tubulin mAb-Alexa546. **(F)** (*left*) Latrunculin B treatment disrupted PKC $\alpha$ -GFP/CD9-mCherry  
442 colocalization at cliffs. (*right*) Blebbistatin treatment had no impact on cliff structure. Scale bars, 5  
443  $\mu\text{m}$ .

444 **References**

- 445 1. Trerotola, M., Cantanelli, P., Guerra, E., Tripaldi, R., Aloisi, A.L., Bonasera, V., Lattanzio,  
446 R., de Lange, R., Weidle, U.H., Piantelli, M., and Alberti, S. (2013). Up-regulation of Trop-  
447 2 quantitatively stimulates human cancer growth. *Oncogene* 32 222-233.
- 448 2. Zanna, P., Trerotola, M., Vacca, G., Bonasera, V., Palombo, B., Guerra, E., Rossi, C.,  
449 Lattanzio, R., Piantelli, M., and Alberti, S. (2007). Trop-1 Are Conserved Growth Stimulatory  
450 Molecules That Mark Early Stages of Tumor Progression. *Cancer* 110, 452-464.
- 451 3. Munz, M., Kieu, C., Mack, B., Schmitt, B., Zeidler, R., and Gires, O. (2004). The carcinoma-  
452 associated antigen EpCAM upregulates c-myc and induces cell proliferation. *Oncogene* 23,  
453 5748-5758. [10.1038/sj.onc.1207610](https://doi.org/10.1038/sj.onc.1207610).
- 454 4. Guerra, E., Trerotola, M., Relli, V., Lattanzio, R., Tripaldi, R., Vacca, G., Ceci, M., Boujnah,  
455 K., Garbo, V., Moschella, A., et al. (2021). Trop-2 induces ADAM10-mediated cleavage of  
456 E-cadherin and drives EMT-less metastasis in colon cancer. *Neoplasia* 23, 898-911.  
457 <https://doi.org/10.1016/j.neo.2021.07.002>.
- 458 5. Guerra, E., Trerotola, M., and Alberti, S. (2023). Targeting Trop-2 as a Cancer Driver. *Journal*  
459 *of Clinical Oncology* 41, 4688-4692. [10.1200/JCO.23.01207](https://doi.org/10.1200/JCO.23.01207).
- 460 6. Munz, M., Baeuerle, P.A., and Gires, O. (2009). The emerging role of EpCAM in cancer and  
461 stem cell signaling. *Cancer Res* 69, 5627-5629. 0008-5472.CAN-09-0654 [pii] [10.1158/0008-5472.CAN-09-0654](https://doi.org/10.1158/0008-5472.CAN-09-0654).
- 463 7. Guerra, E., Di Pietro, R., Stati, G., and Alberti, S. (2023). A non-mutated TROP2 fingerprint  
464 in cancer genetics. *Frontiers in Oncology* 13, 1-8. [10.3389/fonc.2023.1151090](https://doi.org/10.3389/fonc.2023.1151090).
- 465 8. Bjork, P., Jonsson, U., Svedberg, H., Larsson, K., Lind, P., Dillner, J., Hedlund, G., Dohlsten,  
466 M., and Kalland, T. (1993). Isolation, partial characterization, and molecular cloning of  
467 human colon adenocarcinoma cell-surface glycoprotein recognized by the C215 mouse  
468 monoclonal antibody. *J. Biol. Chem.* 268, 24232-24241.
- 469 9. Schön, M.P., Schön, M., Mattes, M.J., Stein, R., Weber, L., Alberti, S., and Klein, C.E.  
470 (1993). Biochemical and immunological characterization of the human carcinoma- associated  
471 antigen MH 99/KS 1/4. *Int. J. Cancer* 55, 988-995.
- 472 10. Trerotola, M., Guerra, E., Ali, Z., Aloisi, A.L., Ceci, M., Simeone, P., Acciarito, A., Zanna,  
473 P., Vacca, G., D'Amore, A., et al. (2021). Trop-2 cleavage by ADAM10 is an activator switch  
474 for cancer growth and metastasis. *Neoplasia* 23, 415-428. [10.1016/j.neo.2021.03.006](https://doi.org/10.1016/j.neo.2021.03.006).
- 475 11. Guerra, E., Trerotola, M., Relli, V., Lattanzio, R., Tripaldi, R., Ceci, M., Boujnah, K.,  
476 Pantalone, L., Sacchetti, A., Havas, K.M., et al. (2023). 3D-informed targeting of the Trop-2

- 477 signal-activation site drives selective cancer vulnerability. *Mol Cancer Ther* 22, 790-804.  
478 10.1158/1535-7163.Mct-22-0352.
- 479 12. Maetzel, D., Denzel, S., Mack, B., Canis, M., Went, P., Benk, M., Kieu, C., Papior, P.,  
480 Baeuerle, P.A., Munz, M., and Gires, O. (2009). Nuclear signalling by tumour-associated  
481 antigen EpCAM. *Nat Cell Biol* 11, 162-171. ncb1824 [pii] 10.1038/ncb1824.
- 482 13. Stoyanova, T., Goldstein, A.S., Cai, H., Drake, J.M., Huang, J., and Witte, O.N. (2012).  
483 Regulated proteolysis of Trop2 drives epithelial hyperplasia and stem cell self-renewal via  
484 beta-catenin signaling. *Genes Dev* 26, 2271-2285.
- 485 14. Guerra, E., Relli, V., Ceci, M., Tripaldi, R., Simeone, P., Aloisi, A.L., Pantalone, L., La Sorda,  
486 R., Lattanzio, R., Sacchetti, A., et al. (2022). Trop-2, Na<sup>+</sup>/K<sup>+</sup> ATPase, CD9, PKC $\alpha$ , cofilin  
487 assemble a membrane signaling super-complex that drives colorectal cancer growth and  
488 invasion. *Oncogene* 41, 1795-1808. 10.1038/s41388-022-02220-1.
- 489 15. Ripani, E., Sacchetti, A., Corda, D., and Alberti, S. (1998). The human Trop-2 is a tumor-  
490 associated calcium signal transducer. *Int. J. Cancer* 76, 671-676.
- 491 16. Guerra, E., Trerotola, M., Tripaldi, R., Aloisi, A.L., Simeone, P., Sacchetti, A., Relli, V., A,  
492 D.A., La Sorda, R., Lattanzio, R., et al. (2016). Trop-2 induces tumor growth through Akt  
493 and determines sensitivity to Akt inhibitors. *Clin Cancer Res* 22, 4197-4205. 10.1158/1078-  
494 0432.CCR-15-1701.
- 495 17. Guerra, E., Trerotola, M., Aloisi, A.L., Tripaldi, R., Vacca, G., La Sorda, R., Lattanzio, R.,  
496 Piantelli, M., and Alberti, S. (2013). The Trop-2 signalling network in cancer growth.  
497 *Oncogene* 32, 1594-1600.
- 498 18. Ambrogi, F., Fornili, M., Boracchi, P., Trerotola, M., Relli, V., Simeone, P., La Sorda, R.,  
499 Lattanzio, R., Querzoli, P., Pedriali, M., et al. (2014). Trop-2 is a determinant of breast cancer  
500 survival. *PLoS One* 9, e96993. 10.1371/journal.pone.0096993.
- 501 19. Simons, K., and Toomre, D. (2000). Lipid rafts and signal transduction. *Nat. Rev. Mol. Cell.*  
502 *Biol.* 1, 31-39.
- 503 20. Wallace, R. (2010). Neural membrane signaling platforms. *Int J Mol Sci* 11, 2421-2442.  
504 10.3390/ijms11062421.
- 505 21. Delos Santos, R.C., Garay, C., and Antonescu, C.N. (2015). Charming neighborhoods on the  
506 cell surface: plasma membrane microdomains regulate receptor tyrosine kinase signaling.  
507 *Cell Signal* 27, 1963-1976. 10.1016/j.cellsig.2015.07.004.
- 508 22. Alberti, S., Parks, D.R., and Herzenberg, L.A. (1987). A single laser method for subtraction  
509 of cell autofluorescence in flow cytometry. *Cytometry* 8, 114-119. 10.1002/cyto.990080203.



- 510 23. Alberti, S., Bucci, C., Fornaro, M., Robotti, A., and Stella, M. (1991). Immunofluorescence  
511 analysis in flow cytometry: better selection of antibody-labeled cells after fluorescence  
512 overcompensation in the red channel. *J. Histochem. Cytochem.* *39*, 701-706.
- 513 24. Dell'Arciprete, R., Stella, M., Fornaro, M., Ciccocioppo, R., Capri, M.G., Naglieri, A.M., and  
514 Alberti, S. (1996). High-efficiency expression gene cloning by flow cytometry. *J. Histochem.*  
515 *Cytochem.* *44*, 629-640.
- 516 25. Sacchetti, A., Cappetti, V., Crescenzi, C., Celli, N., Rotilio, D., and Alberti, S. (1999). Red  
517 GFP and endogenous porphyrins. *Curr. Biol.* *9*, 391-393.
- 518 26. Sacchetti, A., and Alberti, S. (1999). Protein tags enhance GFP folding in eukaryotic cells.  
519 *Nat. Biotechnol.* *17*, 1046.
- 520 27. Polishchuk, R.S., Polishchuk, E.V., Marra, P., Alberti, S., Buccione, R., Luini, A., and  
521 Mironov, A. (2000). Correlative light-electron microscopy reveals the saccular-tabular  
522 ultrastructure of carriers operating between the Golgi apparatus and the plasma membrane. *J.*  
523 *Cell Biol.* *148*, 45-58.
- 524 28. Zamai, M., Trullo, A., Giordano, M., Corti, V., Arza Cuesta, E., Francavilla, C., Cavallaro,  
525 U., and Caiolfa, V.R. (2019). Number and brightness analysis reveals that NCAM and FGF2  
526 elicit different assembly and dynamics of FGFR1 in live cells. *Journal of Cell Science* *132*,  
527 *jcs220624*. [10.1242/jcs.220624](https://doi.org/10.1242/jcs.220624).
- 528 29. Zamai, M., Trullo, A., Arza, E., Cavallaro, U., and Caiolfa, V.R. (2019). Oligomerization  
529 Dynamics of Cell Surface Receptors in Living Cells by Total Internal Reflection Fluorescence  
530 Microscopy Combined with Number and Brightness Analysis. *JoVE*, e60398.  
531 [doi:10.3791/60398](https://doi.org/10.3791/60398).
- 532 30. Caiolfa, V.R., Zamai, M., Malengo, G., Andolfo, A., Madsen, C.D., Sutin, J., Digman, M.A.,  
533 Gratton, E., Blasi, F., and Sidenius, N. (2007). Monomer dimer dynamics and distribution of  
534 GPI-anchored uPAR are determined by cell surface protein assemblies. *The Journal of cell*  
535 *biology* *179*, 1067-1082. [10.1083/jcb.200702151](https://doi.org/10.1083/jcb.200702151).
- 536 31. Levental, I., Levental, K.R., and Heberle, F.A. (2020). Lipid Rafts: Controversies Resolved,  
537 Mysteries Remain. *Trends in Cell Biology*. [10.1016/j.tcb.2020.01.009](https://doi.org/10.1016/j.tcb.2020.01.009).
- 538 32. van Zanten, T.S., Gomez, J., Manzo, C., Cambi, A., Buceta, J., Reigada, R., and Garcia-  
539 Parajo, M.F. (2010). Direct mapping of nanoscale compositional connectivity on intact cell  
540 membranes. *Proc Natl Acad Sci U S A* *107*, 15437-15442.
- 541 33. Lingwood, D., and Simons, K. (2010). Lipid Rafts As a Membrane-Organizing Principle.  
542 *Science* *327*, 46-50.

- 543 34. Le Naour, F., Andre, M., Boucheix, C., and Rubinstein, E. (2006). Membrane microdomains  
544 and proteomics: lessons from tetraspanin microdomains and comparison with lipid rafts.  
545 *Proteomics* 6, 6447-6454.
- 546 35. Barreiro, O., Zamai, M., Yanez-Mo, M., Tejera, E., Lopez-Romero, P., Monk, P.N., Gratton,  
547 E., Caiolfa, V.R., and Sanchez-Madrid, F. (2008). Endothelial adhesion receptors are  
548 recruited to adherent leukocytes by inclusion in preformed tetraspanin nanoplateforms. *J Cell*  
549 *Biol* 183, 527-542. jcb.200805076 [pii] 10.1083/jcb.200805076.
- 550 36. Levental, I., Grzybek, M., and Simons, K. (2011). Raft domains of variable properties and  
551 compositions in plasma membrane vesicles. *Proc Natl Acad Sci U S A* 108, 11411-11416.
- 552 37. Preiss, S., Namgaladze, D., and Brune, B. (2007). Critical role for classical PKC in activating  
553 Akt by phospholipase A2-modified LDL in monocytic cells. *Cardiovasc Res* 73, 833-840.  
554 S0008-6363(06)00605-5 [pii] 10.1016/j.cardiores.2006.12.019.
- 555 38. Alberti, S. (1998). A phosphoinositide-binding sequence is shared by PH domain target  
556 molecules--a model for the binding of PH domains to proteins. *Proteins* 31, 1-9.  
557 10.1002/(SICI)1097-0134(19980401)31:1<1::AID-PROT1>3.0.CO;2-R [pii].
- 558 39. Alberti, S. (1999). HIKE, a candidate protein binding site for PH domains, is a major  
559 regulatory region of Gbeta proteins. *Proteins* 35, 360-363.
- 560 40. Grossier, J.P., Xouri, G., Goud, B., and Schauer, K. (2013). Cell adhesion defines the  
561 topology of endocytosis and signaling. *EMBO J* 33, 35-45. embj.201385284 [pii]  
562 10.1002/embj.201385284.
- 563 41. Bhullar, K.S., Lagarón, N.O., McGowan, E.M., Parmar, I., Jha, A., Hubbard, B.P., and  
564 Rupasinghe, H.P.V. (2018). Kinase-targeted cancer therapies: progress, challenges and future  
565 directions. *Molecular Cancer* 17, 48. 10.1186/s12943-018-0804-2.
- 566 42. Lee, P.Y., Yeoh, Y., and Low, T.Y. (2022). A recent update on small-molecule kinase  
567 inhibitors for targeted cancer therapy and their therapeutic insights from mass spectrometry-  
568 based proteomic analysis. *The FEBS Journal* n/a. <https://doi.org/10.1111/febs.16442>.
- 569 43. Balzar, M., Bakker, H.A., Briaire-de-Bruijn, I.H., Fleuren, G.J., Warnaar, S.O., and Litvinov,  
570 S.V. (1998). Cytoplasmic tail regulates the intercellular adhesion function of the epithelial  
571 cell adhesion molecule. *Mol. Cell. Biol.* 18, 4833-4843.
- 572 44. Espenel, C., Margeat, E., Dosset, P., Arduise, C., Le Grimellec, C., Royer, C.A., Boucheix,  
573 C., Rubinstein, E., and Milhiet, P.E. (2008). Single-molecule analysis of CD9 dynamics and  
574 partitioning reveals multiple modes of interaction in the tetraspanin web. *J Cell Biol* 182, 765-  
575 776. jcb.200803010 [pii] 10.1083/jcb.200803010.



- 576 45. van Deventer, S., Arp, A.B., and van Spriel, A.B. (2021). Dynamic Plasma Membrane  
577 Organization: A Complex Symphony. *Trends in Cell Biology* 31, 119-129.  
578 <https://doi.org/10.1016/j.tcb.2020.11.004>.
- 579 46. Hennigan, R.F., Moon, C.A., Parysek, L.M., Monk, K.R., Morfini, G., Berth, S., Brady, S.,  
580 and Ratner, N. (2012). The NF2 tumor suppressor regulates microtubule-based vesicle  
581 trafficking via a novel Rac, MLK and p38(SAPK) pathway. *Oncogene*.
- 582 47. Traverse, S., Seedorf, K., Paterson, H., Marshall, C.J., Cohen, P., and Ullrich, A. (1994). EGF  
583 triggers neuronal differentiation of PC12 cells that overexpress the EGF receptor. *Curr Biol*  
584 4, 694-701.
- 585 48. Marshall, C.J. (1995). Specificity of receptor tyrosine kinase signaling: transient versus  
586 sustained extracellular signal-regulated kinase activation. *Cell* 80, 179-185.
